# Supplementary material for: Black strontium titanate nanocrystals of enhanced solar absorption for photocatalysis
Source: Royal Society of Chemistry journal article supplement (doi:10.1039/c5ce01263e), 2015-01-01
Supplement: c5ce01263e1.pdf [file c5ce01263e1.pdf]

## Supporting Information

# Black Strontium Titanate Nanocrystals of Enhanced Solar Absorption for Photocatalysis

Wenli Zhao,<sup>a</sup> Wei Zhao,<sup>a</sup> Guilian Zhu,<sup>a</sup> Tianquan Lin,<sup>a</sup>  
Fangfang Xu<sup>\*a</sup> and Fuqiang Huang<sup>\*a,b</sup>

<sup>a</sup> CAS Key Laboratory of Materials for Energy Conversion and s State Key Laboratory of High Performance Ceramics and Superfine Microstructures, Shanghai Institute of Ceramics, Chinese Academy of Sciences (CAS), Shanghai 200050, P.R. China.

<sup>b</sup> Beijing National Laboratory for Molecular Sciences and State Key Laboratory of Rare Earth Materials Chemistry and Applications, College of Chemistry and Molecular Engineering, Peking University, Beijing 100871, P.R. China.

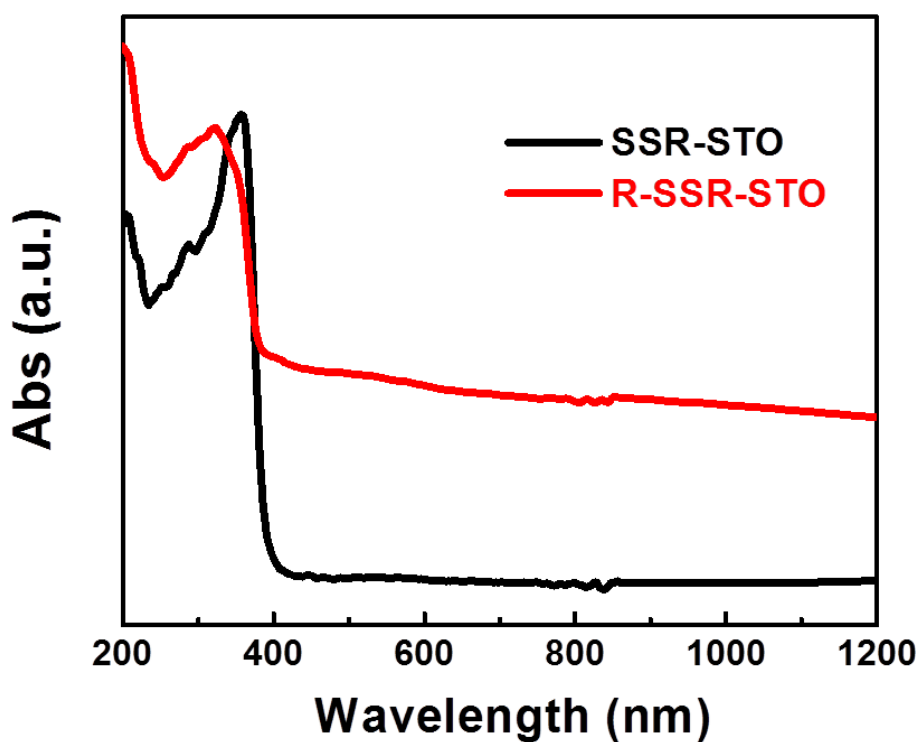

Figure S1. Diffuse reflectance spectra of SSR-STO and R-SSR-STO samples.

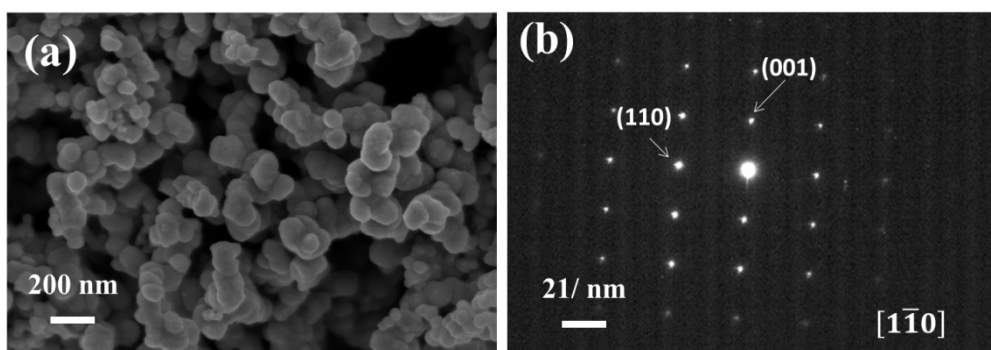

**Figure S2.** (a) SEM image and (b) selected-area electron diffraction (SAED) pattern of R-STO samples.

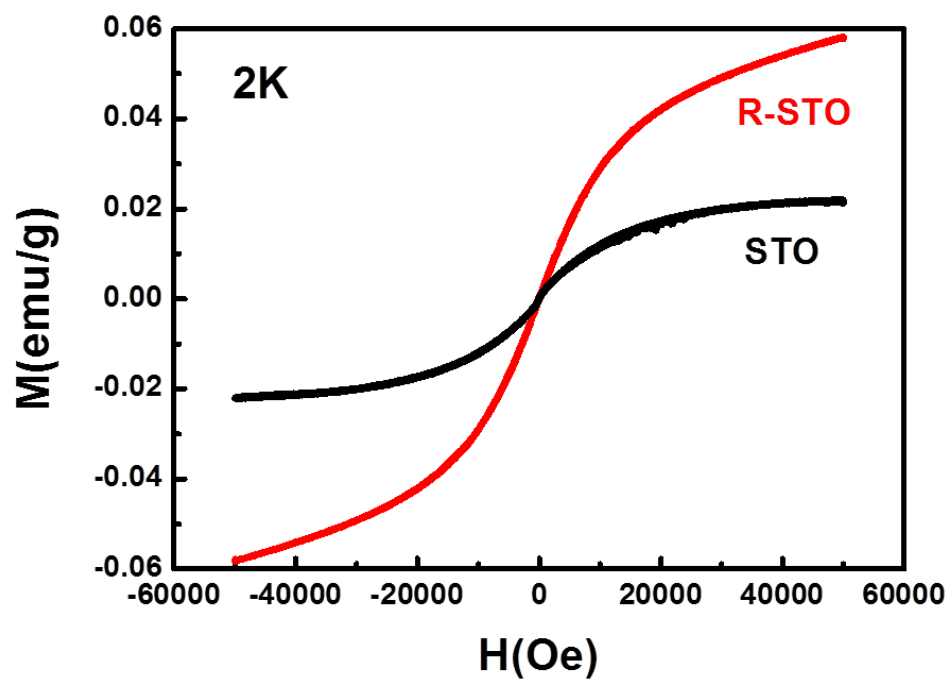

**Figure S3.** Magnetic hysteresis loops of STO and R-STO measured at 2 K

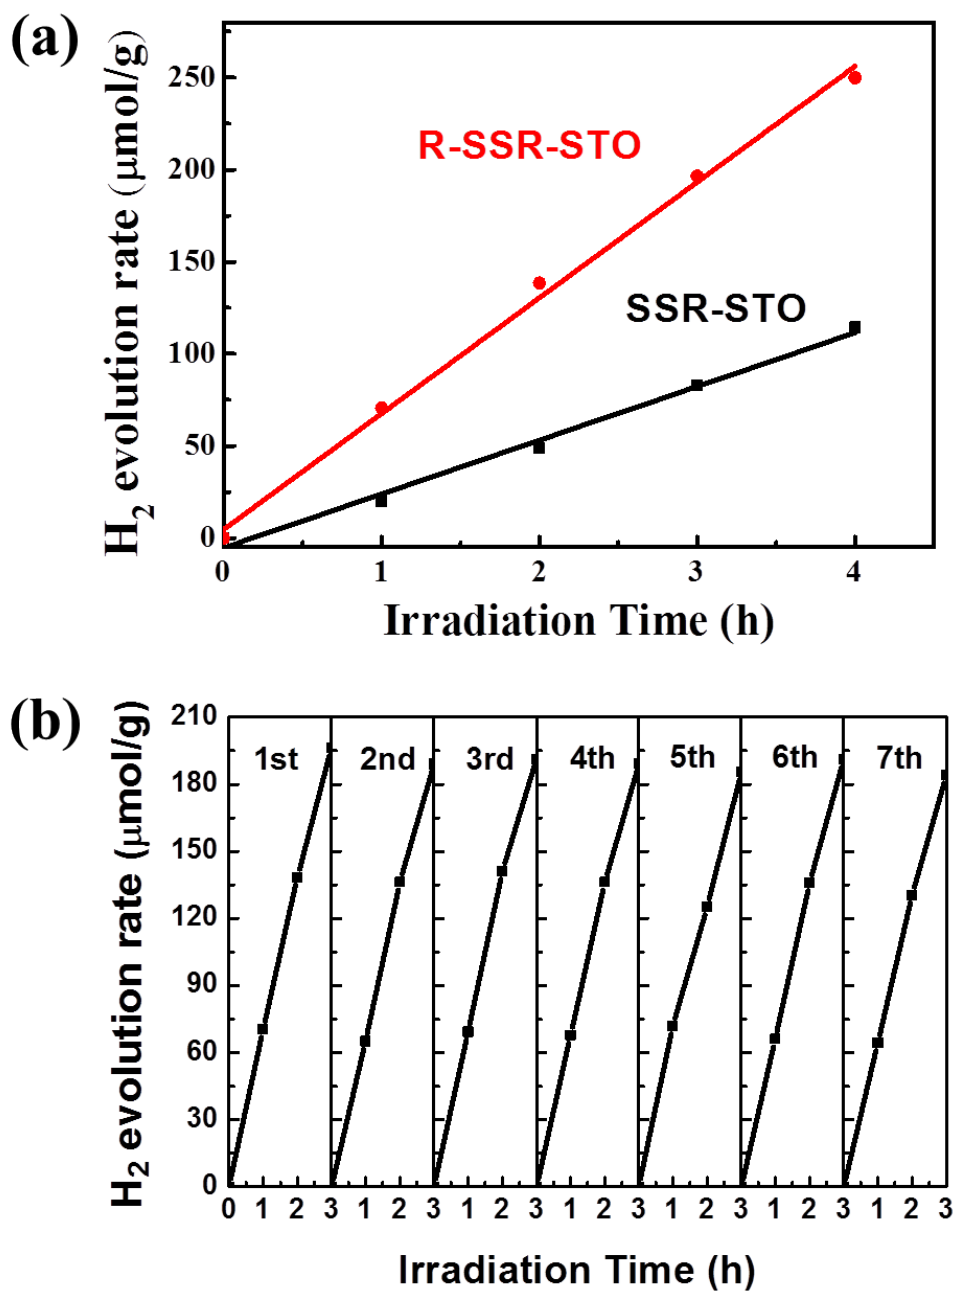

**Figure S4.** (a) solar-light driven photocatalytic water splitting for H<sub>2</sub> generation over SSR-STO and R-SSR-STO samples. (b) cycling tests of solar-driven photocatalytic activity of R-SSR-STO sample.
